# Supplementary material
Source: PubMed Central journal article supplement (PMC9449798)
Supplement: jama-e2214587-s003.pdf [file jama-e2214587-s003.pdf]

O'Connor DA, Glasziou P, Maher CG, et al. Effect of an individualized audit and feedback intervention on rates of musculoskeletal diagnostic imaging requests by Australian general practitioners: a randomized clinical trial. *JAMA*. Published September 6, 2022. doi:10.1001/jama.2022.14587

## **Data Sharing Statement**

### **Data**

**Data available:** No
